# Supplementary material for: Women's Experienced Well-Being and Satisfaction after Breast Reconstruction: A Mixed-Method Study
Source: Research Square preprint supplement (doi:10.21203/rs.3.rs-8592946/v1), 2026-02-18
Supplement: Supplementary file 1 [file 71503980db84813f5dc4f2dd.docx]

| **Supplementary table 1. Non parametric comparisons between reconstruction groups** | | | | | | | | |
| --- | --- | --- | --- | --- | --- | --- | --- | --- |
| Type of breast reconstruction | | | | | |  | | |
|  | **ALL**  **(n=26)** | **IMPLANTS (n=5)** | **DIEP (n=10)** | **LD (n=11)** | ***p* value** | | | ***Bonferroni adjusted***  ***p values*** |
|  |  |  |  |  |  | |  | |
| Age (years) | 52 (45-61) | 44 (41-51) | 52 (47-61) | 60 ( 48-69) | 0.058 | |  | |
| BMI | 25(23-27) | 28 (26-30) | 26 (23-27) | 23(23-26) | 0.025 | | 0.007 implants- LD | |
| Well being |  |  |  |  |  | |  | |
| Psychosocial | 64 (52-77) | 69 (58-81) | 76(64-87) | 52(50-62) | 0.034 | | 0.035 LD-DIEP | |
| Sexual | 43 (34-50) | 43 (36-56) | 45(33-64) | 43(34-50) | 0.866 | |  | |
| Physical | 85 (79-100) | 92 (83-100) | 85 (76-100) | 85 (72-100) | 0.579 | |  | |
| Satisfaction |  |  |  |  |  | |  | |
| Breast | 57 (49-71) | 57 (43-78) | 62 (43-62) | 53 (49-67) | 0.986 | |  | |
| Information | 52 (48-63) | 48 (31-75) | 50(48-61) | 55(49-62) | 0.695 | |  | |
| Numbers are median and IQR 25-75, p values are calculated using KWA | | | | | | | | |
